# Supplementary material for: A Single and Two-Stage, Closed-Tube, Molecular Test for the 2019 Novel Coronavirus (COVID-19) at Home, Clinic, and Points of Entry
Source: PubMed Central journal article supplement — ChemRxiv. 2020 Feb 19:10.26434/chemrxiv.11860137.v1. Preprint. [Version 1] doi: 10.26434/chemrxiv.11860137.v1 (PMC7251958; doi:10.26434/chemrxiv.11860137.v1), 2020-02-19
Supplement: NIHPP11860137-supplement-1.pdf [file NIHPP11860137-supplement-1.pdf]

## Supporting Information

### **A Single and Two-Stage, Closed-Tube, Molecular Test for the 2019 Novel Coronavirus (COVID-19) at Home, Clinic, and Points of Entry**

Mohamed El-Tholoth<sup>a,b</sup>, Haim H. Bau<sup>a</sup>, Jinzhao Song<sup>a\*</sup>

- a. Department of Mechanical Engineering and Applied Mechanics, University of Pennsylvania, Philadelphia PA, USA
- b. Department of Virology, Faculty of Veterinary Medicine, Mansoura University, Mansoura 35516, Egypt

\*Corresponding author: [songjinz@seas.upenn.edu](mailto:songjinz@seas.upenn.edu)

**Table S1.** Coronavirus sequences used for alignment in this study.

| Coronavirus | GISAIID or Genbank accession ID | Specimen source                     | Country  | Patient age | Collection date |
|-------------|---------------------------------|-------------------------------------|----------|-------------|-----------------|
| COVID-2019  | EPI_ISL_402119                  | Alveolar lavage fluid               | China    | 49          | 2019-12-30      |
| COVID-2019  | EPI_ISL_402120                  | Alveolar lavage fluid               | China    | 61          | 2020-01-01      |
| COVID-2019  | EPI_ISL_402121                  | Alveolar lavage fluid               | China    | 32          | 2019-12-30      |
| COVID-2019  | EPI_ISL_402123                  | Bronchoalveolar lavage fluid        | China    | 65          | 2019-12-24      |
| COVID-2019  | EPI_ISL_402124                  | Bronchoalveolar lavage fluid        | China    | 49          | 2019-12-30      |
| COVID-2019  | EPI_ISL_402126                  | Throat swab                         | Japan    | 30          | 2020-01-14      |
| COVID-2019  | EPI_ISL_402127                  | Bronchoalveolar lavage fluid        | China    | 32          | 2019-12-30      |
| COVID-2019  | EPI_ISL_402128                  | Bronchoalveolar lavage fluid        | China    | 52          | 2019-12-30      |
| COVID-2019  | EPI_ISL_402129                  | Bronchoalveolar lavage fluid        | China    | 40          | 2019-12-30      |
| COVID-2019  | EPI_ISL_402130                  | Bronchoalveolar lavage fluid        | China    | 56          | 2019-12-30      |
| COVID-2019  | EPI_ISL_403932                  | Endotracheal aspirates              | China    | 66          | 2020-01-14      |
| COVID-2019  | EPI_ISL_403933                  | Endotracheal aspirates              | China    | 65          | 2020-01-15      |
| COVID-2019  | EPI_ISL_403936                  | Throat swab                         | China    | 68          | 2020-01-17      |
| COVID-2019  | EPI_ISL_403937                  | Nasal swab                          | China    | 49          | 2020-01-18      |
| COVID-2019  | EPI_ISL_403962                  | Nasopharyngeal swab and Throat swab | Thailand | 61          | 2020-01-08      |
| COVID-2019  | EPI_ISL_403963                  | Nasopharyngeal swab and Throat swab | Thailand | 74          | 2020-01-13      |
| COVID-2019  | EPI_ISL_404253                  | Sputum                              | USA      | 63          | 2020-01-21      |
| COVID-2019  | EPI_ISL_404895                  | Oropharyngeal swab                  | USA      | 30          | 2020-01-19      |
| TGEV        | Genebank NC_038861.1            | --                                  | --       | --          | --              |
| PDCoV       | Genebank KX022605.1             | --                                  | --       | --          | --              |
| PEDV        | Genebank NC_003436.1            | --                                  | --       | --          | --              |
| IBV         | Genebank NC_001451.1            | --                                  | --       | --          | --              |
| HCoV-229E   | Genebank NC_002645.1            | --                                  | --       | --          | --              |
| OC43        | GenBank KX344031.1              | --                                  | --       | --          | --              |
| NL63        | GenBank JX504050.1              | --                                  | --       | --          | --              |
| HKU1        | GenBank                         | --                                  | --       | --          | --              |

|      |                         |    |    |    |    |
|------|-------------------------|----|----|----|----|
|      | KF686346.1              |    |    |    |    |
| SARS | Genebank<br>NC_004718.3 | -- | -- | -- | -- |
| MERS | Genebank<br>NC_019843.3 | -- | -- | -- | -- |

**Table S2.** Synthesized COVID-19 DNA (619bp).

| <b>Sequence (5' to 3')</b>                                                                                                                                                                                                                                                                                                                                                                                                                                                                                                                                                                                                                                                            |
|---------------------------------------------------------------------------------------------------------------------------------------------------------------------------------------------------------------------------------------------------------------------------------------------------------------------------------------------------------------------------------------------------------------------------------------------------------------------------------------------------------------------------------------------------------------------------------------------------------------------------------------------------------------------------------------|
| CTGCTAAAGCTTACAAAGATTATCTAGCTAGTGGGGGACAACCAATCACTAATTGTGTTA<br>AGATGTTGTGTACACACACTGGTACTGGTCAGGCAATAACAGTTACACCGGAAGCCAAT<br>ATGGATCAAGAATCCTTTGGTGGTGCATCGTGTGTTGTCTGTACTGCCGTTGCCACATAGAT<br>CATCCAAATCCTAAAGGATTTTGTGACTTAAAAGGTAAGTATGTACAAATACCTACAACCTT<br>GTGCTAATGACCCTGTGGGTTTTACACTTAAAAACACAGTCTGTACCGTCTGCGGTATGT<br>GGAAAGGTTATGGCTGTAGTTGTGATCAACTCCGCGAACCCATGCTTCAGTCAGCTGAT<br>GCACAATCGTTTTTAAACGGGTTTTCGCGGTGTAAGTGCAGCCCGTCTTACACCGTGCGGC<br>ACAGGCACTAGTACTGATGTCGTATACAGGGCTTTTGACATCTACAATGATAAAGTAGCT<br>GGTTTTGCTAAATTCCTAAAACTAATTGTTGTCGTTCCAAGAAAAGGACGAAGATGAC<br>AATTTAATTGATTCTTACTTTGTAGTTAAGAGACACACTTTCTCTAACTACCAACATGAAGA<br>ACAATTTATAATTTACTT |

**Table S3.** The sequences of PCR primers and TaqMan probe.

| <b>Primer name</b> | <b>Sequence (5' to 3')</b>                   |
|--------------------|----------------------------------------------|
| COVID-2019-Fw      | CCCTGTGGGTTTTACACTTAA                        |
| COVID-2019-Rv      | ACGATTGTGCATCAGCTGA                          |
| COVID-2019-Probe   | /56-FAM/CCGTCTGCGGTATGTGGAAAGGTTATGG/3BHQ_1/ |

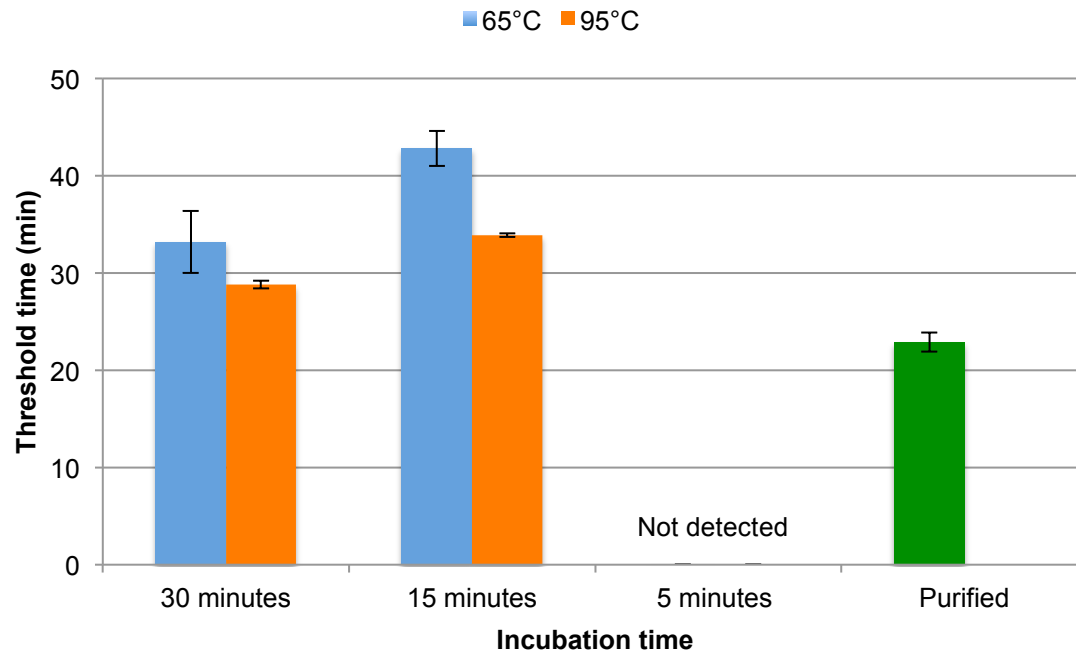

**Figure S1. Rapid Sample Preparation for one-tube Penn-RAMP.** 500 HIV virus particles were spiked in nasal swab and heated at 65°C and 95°C with various times (indicated). Their threshold times were compared with the one from purified HIV RNA (500 copies).

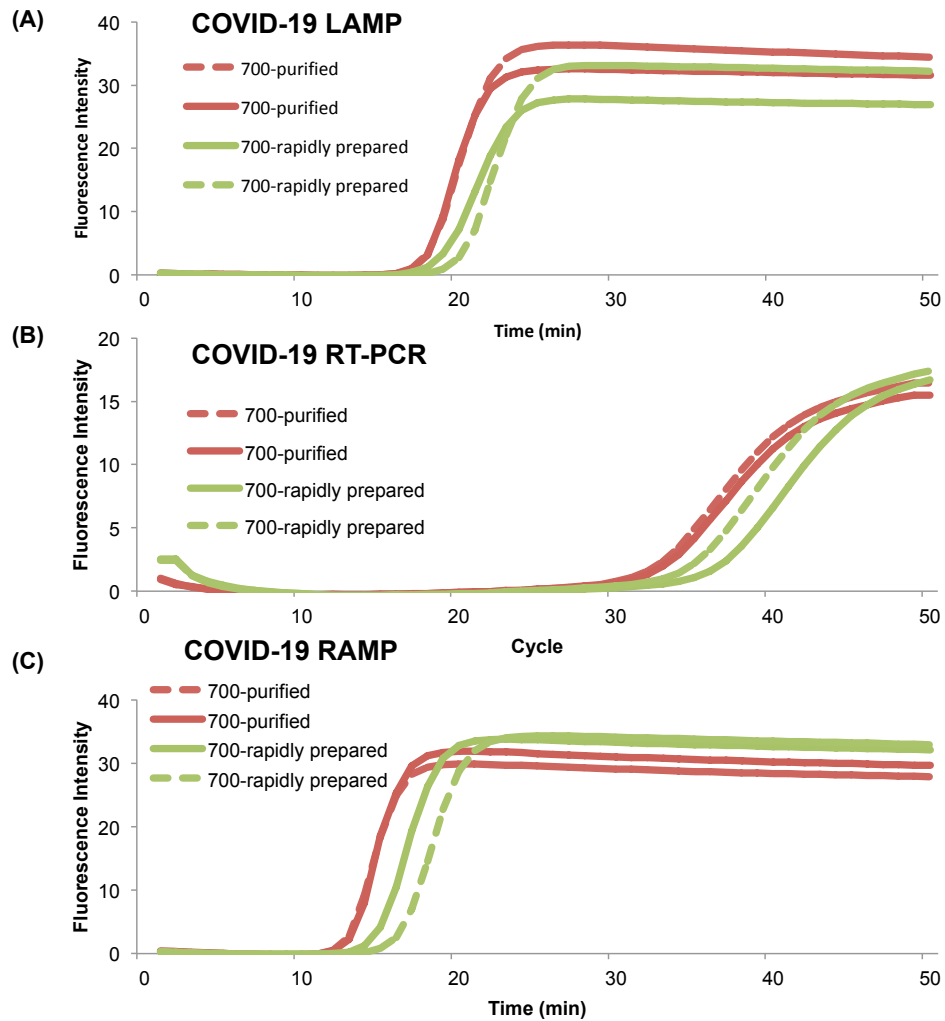

**Figure S2. Comparison of threshold times or cycle of purified and rapidly prepared samples.** (A) LAMP, (B) RT-PCR, (C) Closed-Tube Penn-RAMP. Threshold time and cycle of the rapidly prepared sample compared with the purified sample. 700 copies of COVID-2019 synthetic DNA were used for the testing.
